# Supplementary material for: Severity of injuries in different modes of transport, expressed with disability-adjusted life years (DALYs)
Source: PubMed Central journal article supplement (PMC4131023; doi:10.1186/1471-2458-14-765), 2014-07-29
Supplement: 12889_2014_6904_MOESM1_ESM.pdf [file 12889_2014_6904_MOESM1_ESM.pdf]

**Additional file 1 to Tainio et al. 2014 (BMC Public Health).**

**Table S1:** Disability weights and duration of injury for different injury types (Begg and Tomijima 2006). For the injuries with duration of 'lifelong', the duration is same as the expected life expectancy of the person with same age and gender (see Table S3, Additional file 2).

| <b>Injury type</b>                     | <b>Disability weight</b> | <b>Duration (year)</b> |
|----------------------------------------|--------------------------|------------------------|
| Fractured skull                        | 0.431                    | 0.107                  |
| Fractured skull (lifelong)             | 0.361                    | Lifelong               |
| Fractured face bones                   | 0.223                    | 0.118                  |
| Fractured vertebral column             | 0.226                    | 0.14                   |
| Fractured rib or sternum               | 0.199                    | 0.115                  |
| Fractured pelvis                       | 0.247                    | 0.126                  |
| Fractured clavicle, scapula or humerus | 0.143                    | 0.112                  |
| Fractured radius or ulna               | 0.18                     | 0.112                  |
| Fractured hand bones                   | 0.1                      | 0.07                   |
| Fractured femur                        | 0.372                    | 0.14                   |
| Fractured femur (lifelong)             | 0.272                    | Lifelong               |
| Fractured patella, tibia or fibula     | 0.271                    | 0.09                   |
| Fractured ankle                        | 0.196                    | 0.096                  |
| Fractured foot bones                   | 0.077                    | 0.073                  |
| Injured spinal cord (lifelong)         | 0.725                    | Lifelong               |
| Dislocations shoulder, elbow or hip    | 0.074                    | 0.034                  |
| Dislocations other dislocation         | 0.074                    | 0.019                  |
| Sprains                                | 0.064                    | 0.038                  |
| Intracranial injuries                  | 0.359                    | 0.067                  |
| Intracranial injuries (lifelong)       | 0.361                    | Lifelong               |
| Internal injuries                      | 0.208                    | 0.042                  |
| Open wound                             | 0.108                    | 0.024                  |
| Injury to eyes                         | 0.108                    | 0.019                  |
| Injury to eyes (lifelong)              | 0.299                    | Lifelong               |
| Amputations, thumb, finger (lifelong)  | 0.134                    | Lifelong               |
| Amputations, arm (lifelong)            | 0.257                    | Lifelong               |
| Amputations, toe (lifelong)            | 0.102                    | Lifelong               |
| Amputations, foot, leg (lifelong)      | 0.3                      | Lifelong               |
| Crushing                               | 0.218                    | 0.094                  |
| Burns <20%                             | 0.158                    | 0.083                  |
| Burns >20% (lifelong)                  | 0.255                    | Lifelong               |
| Burns <20% (lifelong)                  | 0.001                    | Lifelong               |
| Burns >20%                             | 0.441                    | 0.279                  |
| Injured nerves (lifelong)              | 0.064                    | Lifelong               |
| Poisoning                              | 0.909                    | 0.008                  |

**Table S2:** Description of the transport modes used in the study. Number in the parenthesis refers to the STRADA code of the mode.

| <b>Mode of transport</b> | <b>Sub-modes</b>                                                                                                                  |
|--------------------------|-----------------------------------------------------------------------------------------------------------------------------------|
| Pedestrian               | Pedestrian (10)                                                                                                                   |
| Bicycle                  | Bicycle (20)                                                                                                                      |
| Other active travel mode | Roller skates (11), wheel chair (12), skateboard (13), kick bike (14, 15) and other pedestrian (16)                               |
| Moped                    | Moped (30) and scooter (31)                                                                                                       |
| Motorcycle               | Motorcycle (40), heavy motorcycle (41) and light motorcycle (42)                                                                  |
| Car                      | Passenger car (50) and minivan (51)                                                                                               |
| Truck                    | Truck (60), heavy truck (61) and light truck (62)                                                                                 |
| Bus                      | Bus (70)                                                                                                                          |
| Other, unknown, missing  | Other (80), snowmobile (81), tram (82), tractor (83), train (84), rider (85), all-terrain vehicle (86), unknown (90), missing (0) |

**Table S3:** Remaining life expectancy at different age and gender. The life expectations are based on a model life table, called Coale and Demeny West level 26 (Murray 1994). Life expectancy data was used to calculate the loss of life expectancy (YLL) and the duration of injuries for lifelong injuries.

|     | Life expectancy |        |     | Life expectancy |        |
|-----|-----------------|--------|-----|-----------------|--------|
| Age | Male            | Female | Age | Male            | Female |
| 0   | 80.00           | 82.50  | 51  | 30.06           | 33.07  |
| 1   | 79.36           | 81.84  | 52  | 29.12           | 32.14  |
| 2   | 78.36           | 80.87  | 53  | 28.19           | 31.22  |
| 3   | 77.37           | 79.90  | 54  | 27.26           | 30.29  |
| 4   | 76.38           | 78.92  | 55  | 26.32           | 29.37  |
| 5   | 75.38           | 77.95  | 56  | 25.42           | 28.46  |
| 6   | 74.39           | 76.96  | 57  | 24.52           | 27.55  |
| 7   | 73.39           | 75.97  | 58  | 23.61           | 26.65  |
| 8   | 72.39           | 74.97  | 59  | 22.71           | 25.74  |
| 9   | 71.40           | 73.98  | 60  | 21.81           | 24.83  |
| 10  | 70.40           | 72.99  | 61  | 20.95           | 23.95  |
| 11  | 69.40           | 72.00  | 62  | 20.09           | 23.07  |
| 12  | 68.41           | 71.00  | 63  | 19.22           | 22.20  |
| 13  | 67.41           | 70.01  | 64  | 18.36           | 21.32  |
| 14  | 66.41           | 69.01  | 65  | 17.50           | 20.44  |
| 15  | 65.41           | 68.02  | 66  | 16.71           | 19.59  |
| 16  | 64.42           | 67.03  | 67  | 15.93           | 18.74  |
| 17  | 63.42           | 66.04  | 68  | 15.15           | 17.90  |
| 18  | 62.43           | 65.06  | 69  | 14.36           | 17.05  |
| 19  | 61.43           | 64.07  | 70  | 13.58           | 16.20  |
| 20  | 60.44           | 63.08  | 71  | 12.89           | 15.42  |
| 21  | 59.44           | 62.10  | 72  | 12.21           | 14.63  |
| 22  | 58.45           | 61.12  | 73  | 11.53           | 13.85  |
| 23  | 57.46           | 60.13  | 74  | 10.85           | 13.06  |
| 24  | 56.46           | 59.15  | 75  | 10.17           | 12.28  |
| 25  | 55.47           | 58.17  | 76  | 9.62            | 11.60  |
| 26  | 54.48           | 57.19  | 77  | 9.08            | 10.93  |
| 27  | 53.49           | 56.21  | 78  | 8.53            | 10.25  |
| 28  | 52.50           | 55.23  | 79  | 7.99            | 9.58   |
| 29  | 51.50           | 54.25  | 80  | 7.45            | 8.90   |
| 30  | 50.51           | 53.27  | 81  | 7.01            | 8.36   |
| 31  | 49.52           | 52.29  | 82  | 6.56            | 7.83   |
| 32  | 48.53           | 51.31  | 83  | 6.12            | 7.29   |
| 33  | 47.54           | 50.34  | 84  | 5.68            | 6.76   |
| 34  | 46.55           | 49.36  | 85  | 5.24            | 6.22   |
| 35  | 45.57           | 48.38  | 86  | 4.90            | 5.83   |

|           |       |       |            |      |      |
|-----------|-------|-------|------------|------|------|
| <b>36</b> | 44.58 | 47.41 | <b>87</b>  | 4.56 | 5.43 |
| <b>37</b> | 43.60 | 46.44 | <b>88</b>  | 4.22 | 5.04 |
| <b>38</b> | 42.61 | 45.47 | <b>89</b>  | 3.88 | 4.64 |
| <b>39</b> | 41.63 | 44.50 | <b>90</b>  | 3.54 | 4.25 |
| <b>40</b> | 40.64 | 43.53 | <b>91</b>  | 3.30 | 3.98 |
| <b>41</b> | 39.67 | 42.57 | <b>92</b>  | 3.05 | 3.71 |
| <b>42</b> | 38.69 | 41.61 | <b>93</b>  | 2.80 | 3.43 |
| <b>43</b> | 37.72 | 40.64 | <b>94</b>  | 2.56 | 3.16 |
| <b>44</b> | 36.74 | 39.68 | <b>95</b>  | 2.31 | 2.89 |
| <b>45</b> | 35.77 | 38.72 | <b>96</b>  | 2.14 | 2.71 |
| <b>46</b> | 34.81 | 37.77 | <b>97</b>  | 1.97 | 2.53 |
| <b>47</b> | 33.86 | 36.83 | <b>98</b>  | 1.80 | 2.36 |
| <b>48</b> | 32.90 | 35.88 | <b>99</b>  | 1.63 | 2.18 |
| <b>49</b> | 31.95 | 34.94 | <b>100</b> | 1.46 | 2.00 |
| <b>50</b> | 30.99 | 33.99 |            |      |      |

**Table S4:** DALYs, YLDs and YLLs due to transport injuries and fatalities in Sweden in 2007-2011. The YLDs in the 'YLD (Sweden)' row are adjusted for the data coverage. See text for details.

| <b>Year</b>                                  | <b>2007</b> | <b>2008</b> | <b>2009</b> | <b>2010</b> | <b>2011</b> | <b>Average</b> |
|----------------------------------------------|-------------|-------------|-------------|-------------|-------------|----------------|
| <b>Population of Sweden</b>                  | 9,147,057   | 9,216,748   | 9,256,347   | 9,340,682   | 9,415,570   | 9,275,281      |
| <b>YLD (based on data)</b>                   | 5,589       | 7,513       | 6,073       | 7,756       | 6,422       | -              |
| <b>Coverage of population in injury data</b> | 64%         | 70%         | 74%         | 82%         | 89%         | -              |
| <b>YLD (Sweden)</b>                          | 8,713       | 10,762      | 8,193       | 9,485       | 7,251       | 8,881          |
| <b>YLL (Sweden)</b>                          | 17,531      | 14,273      | 13,030      | 9,748       | 11,182      | 13,153         |
| <b>DALY (Sweden) (YLD+YLL)</b>               | 26,244      | 25,036      | 21,223      | 19,233      | 18,433      | 22,034         |
| <b>Percentage of DALYs due to YLDs</b>       | 33%         | 43%         | 39%         | 49%         | 39%         | 41%            |
| <b>YLDs per 100 000 inhabitants</b>          | 95          | 117         | 89          | 102         | 77          | 96             |
| <b>YLLs per 100 000 inhabitants</b>          | 192         | 155         | 141         | 104         | 119         | 142            |

**Table S5:** Contribution of lifelong and temporal injuries to total YLDs in Sweden.

| <b>Injury type</b>  | <b>Number of injuries</b> |             | <b>YLDs</b>   |             |
|---------------------|---------------------------|-------------|---------------|-------------|
|                     | <b>#</b>                  | <b>%</b>    | <b>YLDs</b>   | <b>%</b>    |
| Lifelong injury     | 2,167                     | 2%          | 31,900        | 96%         |
| Temporal injury     | 121,206                   | 98%         | 1,454         | 4%          |
| <b>All injuries</b> | <b>123,373</b>            | <b>100%</b> | <b>33,354</b> | <b>100%</b> |

**Table S6:** Average DALYs, YLDs and YLLs in Sweden due to injuries (YLDs) and fatalities (YLLs) sustained in different mode of transport. The results are averaged over the five study years. YLDs presented in this table are adjusted for the data coverage. See text for details.

| <b>Mode of transport</b>            | <b>YLD<br/>(injury)</b> | <b>YLL<br/>(deaths)</b> | <b>DALY<br/>(YLD+YLL)</b> | <b>% (DALY)</b> |
|-------------------------------------|-------------------------|-------------------------|---------------------------|-----------------|
| <b>Pedestrian</b>                   | 1,391                   | 1,237                   | 2,628                     | 12%             |
| <b>Bicycle</b>                      | 1,933                   | 636                     | 2,569                     | 12%             |
| <b>Other active travel<br/>mode</b> | 109                     | 0                       | 109                       | 0%              |
| <b>Moped</b>                        | 870                     | 505                     | 1,375                     | 6%              |
| <b>Motorcycle</b>                   | 816                     | 2,038                   | 2,855                     | 13%             |
| <b>Car</b>                          | 3,378                   | 7,811                   | 11,189                    | 51%             |
| <b>Truck</b>                        | 113                     | 537                     | 650                       | 3%              |
| <b>Bus</b>                          | 66                      | 75                      | 141                       | 1%              |
| <b>Other, unknown,<br/>missing</b>  | 205                     | 313                     | 518                       | 2%              |
| <b>Total</b>                        | <b>8,881</b>            | <b>13,153</b>           | <b>22,034</b>             | <b>100%</b>     |

**Table S7:** The average and median YLDs (SD = standard deviation) per injured person for different mode of transport and gender (temporal injuries).

| Mode of transport        | YLD per injured person (male) |               |               | YLD per injured person (female) |               |               |
|--------------------------|-------------------------------|---------------|---------------|---------------------------------|---------------|---------------|
|                          | Average                       | Median        | SD            | Average                         | Median        | SD            |
| Pedestrian               | 0.0143                        | 0.0160        | 0.0127        | 0.0164                          | 0.0202        | 0.0114        |
| Bicycle                  | 0.0129                        | 0.0070        | 0.0115        | 0.0134                          | 0.0160        | 0.0116        |
| Other active travel mode | 0.0123                        | 0.0070        | 0.0107        | 0.0144                          | 0.0160        | 0.0116        |
| Moped                    | 0.0115                        | 0.0056        | 0.0115        | 0.0087                          | 0.0026        | 0.0100        |
| Motorcycle               | 0.0148                        | 0.0160        | 0.0120        | 0.0132                          | 0.0070        | 0.0111        |
| Car                      | 0.0077                        | 0.0024        | 0.0103        | 0.0065                          | 0.0024        | 0.0093        |
| Truck                    | 0.0092                        | 0.0026        | 0.0112        | 0.0079                          | 0.0024        | 0.0098        |
| Bus                      | 0.0096                        | 0.0026        | 0.0116        | 0.0124                          | 0.0026        | 0.0133        |
| Other, unknown, missing  | 0.0133                        | 0.0070        | 0.0127        | 0.0135                          | 0.0070        | 0.0122        |
| <b>Average</b>           | <b>0.0114</b>                 | <b>0.0026</b> | <b>0.0118</b> | <b>0.0126</b>                   | <b>0.0070</b> | <b>0.0116</b> |



**Table S8:** The average and median YLDs (SD = standard deviation) per injured person for different age categories and gender (lifelong injuries). For graphical presentation of averages YLDs, see Figure 1.

| Age category | YLD per injured person (male) |        |     | YLD per injured person (female) |        |     | Number of lifelong injuries (male) | Number of lifelong injuries (female) |
|--------------|-------------------------------|--------|-----|---------------------------------|--------|-----|------------------------------------|--------------------------------------|
|              | Average                       | Median | SD  | Average                         | Median | SD  |                                    |                                      |
| 0-9          | 24.3                          | 27.2   | 7.3 | 29.6                            | 28.1   | 7.3 | 12                                 | 14                                   |
| 10-19        | 23.1                          | 22.9   | 6.9 | 26.4                            | 24.2   | 8.3 | 227                                | 115                                  |
| 20-29        | 22.2                          | 20.4   | 8.7 | 25.9                            | 22.1   | 9.5 | 258                                | 102                                  |
| 30-39        | 17.1                          | 16.1   | 6.7 | 21.2                            | 18.2   | 8.0 | 178                                | 71                                   |
| 40-49        | 15.1                          | 13.3   | 5.6 | 16.3                            | 14.3   | 6.1 | 161                                | 70                                   |
| 50-59        | 10.4                          | 9.5    | 3.2 | 11.7                            | 10.6   | 4.3 | 175                                | 93                                   |
| 60-69        | 6.9                           | 6.6    | 2.2 | 8.3                             | 7.7    | 2.7 | 171                                | 114                                  |
| 70-79        | 4.0                           | 3.9    | 1.0 | 4.8                             | 4.7    | 1.4 | 122                                | 111                                  |
| 80+          | 2.1                           | 2.1    | 0.5 | 2.4                             | 2.4    | 0.7 | 97                                 | 76                                   |

**Table S9:** Percentage of different injuries in different modes of transport.

| <b>Injury type</b>                     | <b>Pedestrian</b> | <b>Bicycle</b> | <b>Other active travel mode</b> | <b>Moped</b> | <b>Motor-cycle</b> | <b>Car</b> | <b>Truck</b> | <b>Bus</b> | <b>Other, unknown, missing</b> |
|----------------------------------------|-------------------|----------------|---------------------------------|--------------|--------------------|------------|--------------|------------|--------------------------------|
| Fractured skull                        | 0.2%              | 0.5%           | 0.7%                            | 0.3%         | 0.5%               | 0.2%       | 0.5%         | 0.3%       | 0.6%                           |
| Fractured skull (lifelong)             | 0.1%              | 0.1%           | 0.2%                            | 0.1%         | 0.2%               | 0.1%       | 0.2%         | 0.1%       | 0.0%                           |
| Fractured face bones                   | 2.3%              | 5.3%           | 2.7%                            | 1.9%         | 1.6%               | 1.4%       | 1.8%         | 1.3%       | 2.0%                           |
| Fractured vertebral column             | 0.8%              | 1.1%           | 0.4%                            | 1.0%         | 5.4%               | 3.7%       | 6.3%         | 4.5%       | 4.4%                           |
| Fractured rib or sternum               | 1.0%              | 1.9%           | 0.7%                            | 1.6%         | 7.4%               | 3.2%       | 3.5%         | 3.8%       | 3.5%                           |
| Fractured pelvis                       | 1.3%              | 1.0%           | 0.5%                            | 0.6%         | 1.7%               | 0.6%       | 1.1%         | 1.3%       | 1.7%                           |
| Fractured clavicle, scapula or humerus | 8.4%              | 7.9%           | 7.5%                            | 6.4%         | 10.0%              | 0.9%       | 2.0%         | 3.8%       | 5.9%                           |
| Fractured radius or ulna               | 24.9%             | 13.2%          | 23.2%                           | 6.0%         | 6.1%               | 0.8%       | 1.4%         | 4.4%       | 8.1%                           |
| Fractured hand bones                   | 4.9%              | 6.6%           | 8.7%                            | 4.8%         | 6.6%               | 0.9%       | 1.1%         | 2.6%       | 4.5%                           |
| Fractured femur                        | 4.1%              | 2.1%           | 2.1%                            | 1.7%         | 2.1%               | 0.5%       | 0.6%         | 3.3%       | 2.8%                           |
| Fractured femur (lifelong)             | 0.1%              | 0.1%           | 0.0%                            | 0.6%         | 1.2%               | 0.2%       | 0.3%         | 0.1%       | 0.6%                           |
| Fractured patella, tibia or fibula     | 7.0%              | 3.3%           | 3.4%                            | 4.9%         | 7.7%               | 0.7%       | 1.1%         | 2.1%       | 3.5%                           |
| Fractured ankle                        | 5.0%              | 1.4%           | 1.8%                            | 1.7%         | 2.5%               | 0.2%       | 0.2%         | 0.7%       | 2.0%                           |
| Fractured foot bones                   | 1.6%              | 1.1%           | 1.7%                            | 2.7%         | 3.0%               | 0.3%       | 1.0%         | 1.3%       | 0.7%                           |
| Injured spinal cord (lifelong)         | 0.1%              | 0.1%           | 0.0%                            | 0.1%         | 0.7%               | 0.4%       | 0.3%         | 0.4%       | 0.6%                           |
| Dislocations shoulder, elbow or hip    | 1.3%              | 1.5%           | 1.5%                            | 0.6%         | 1.7%               | 0.1%       | 0.4%         | 0.4%       | 1.3%                           |
| Dislocations other                     | 1.0%              | 0.7%           | 0.9%                            | 0.4%         | 0.3%               | 0.3%       | 0.2%         | 0.6%       | 0.4%                           |



**Table S10:** Percentage of different injury types in the present, Lapostolle et al. (2009) and Murray and Lopez (1996) studies.

|                                        | Present (male) | Present (female) | Lapostolle et al. 2009 (male) | Lapostolle et al. 2009 (female) | Murray and Lopez 1996 |
|----------------------------------------|----------------|------------------|-------------------------------|---------------------------------|-----------------------|
| Fractured skull                        | 0.4%           | 0.2%             | 0.5%                          | 0.3%                            | 1.8%                  |
| Fractured skull (lifelong)             | 0.1%           | 0.1%             | 0.1%                          | 0.1%                            | 0.3%                  |
| Fractured face bones                   | 2.9%           | 2.5%             | 2.2%                          | 1.7%                            | 3.1%                  |
| Fractured vertebral column             | 2.6%           | 1.4%             | 1.4%                          | 1.4%                            | 3.1%                  |
| Fractured rib or sternum               | 3.0%           | 1.4%             | 3.0%                          | 4.0%                            | 3.0%                  |
| Fractured pelvis                       | 0.8%           | 1.1%             | 1.1%                          | 1.5%                            | 2.2%                  |
| Fractured clavicle, scapula or humerus | 5.7%           | 6.0%             | 4.4%                          | 2.8%                            | 5.1%                  |
| Fractured radius or ulna               | 7.3%           | 17.4%            | 4.8%                          | 4.1%                            | 5.8%                  |
| Fractured hand bones                   | 4.8%           | 3.5%             | 3.4%                          | 1.6%                            | 1.1%                  |
| Fractured femur                        | 2.1%           | 2.4%             | 1.0%                          | 0.5%                            | 7.3%                  |
| Fractured femur (lifelong)             | 0.3%           | 0.1%             | 0.7%                          | 0.3%                            | 0.4%                  |
| Fractured patella, tibia or fibula     | 3.5%           | 4.3%             | 3.4%                          | 2.3%                            | 9.4%                  |
| Fractured ankle                        | 1.8%           | 2.7%             | 1.6%                          | 1.2%                            | 3.2%                  |
| Fractured foot bones                   | 1.1%           | 1.3%             | 1.7%                          | 1.1%                            | 0.9%                  |
| Injured spinal cord (lifelong)         | 0.2%           | 0.2%             | 0.4%                          | 0.5%                            | 1.5%                  |
| Dislocations shoulder, elbow or hip    | 1.3%           | 0.7%             | 1.5%                          | 0.7%                            | 1.5%                  |
| Dislocations other dislocation         | 0.6%           | 0.6%             | 16.6%                         | 37.2%                           | 0.0%                  |
| Sprains                                | 26.2%          | 28.9%            | 7.4%                          | 5.6%                            | 2.5%                  |
| Intracranial injuries                  | 8.0%           | 7.2%             | 0.8%                          | 0.5%                            | 35.7%                 |
| Intracranial injuries (lifelong)       | 1.6%           | 0.9%             | 0.9%                          | 0.5%                            | 1.9%                  |
| Internal injuries                      | 0.8%           | 0.4%             | 2.9%                          | 1.8%                            | 2.7%                  |
| Open wound                             | 24.4%          | 16.7%            | 39.5%                         | 30.0%                           | 5.4%                  |
| Injury to eyes                         | 0.1%           | 0.0%             | 0.3%                          | 0.3%                            | 0.0%                  |
| Injury to eyes (lifelong)              | 0.0%           | 0.0%             | 0.0%                          | 0.0%                            | 0.1%                  |
| Amputations, thumb, finger (lifelong)  | 0.0%           | 0.0%             | 0.0%                          | 0.0%                            | 0.1%                  |
| Amputations, arm (lifelong)            | 0.0%           | 0.0%             | 0.0%                          | 0.0%                            | 0.0%                  |
| Amputations, toe (lifelong)            | 0.0%           | 0.0%             | 0.0%                          | 0.0%                            | 0.0%                  |

|                                   |        |        |        |        |        |
|-----------------------------------|--------|--------|--------|--------|--------|
| Amputations, foot, leg (lifelong) | 0.0%   | 0.0%   | 0.0%   | 0.0%   | 0.1%   |
| Crushing                          | 0.0%   | 0.0%   | 0.1%   | 0.1%   | 0.8%   |
| Burns <20%                        | 0.1%   | 0.0%   | 0.0%   | 0.0%   | 0.0%   |
| Burns >20% (lifelong)             | 0.0%   | 0.0%   | 0.0%   | 0.0%   | 0.0%   |
| Burns <20% (lifelong)             | 0.0%   | 0.0%   | 0.0%   | 0.0%   | 0.1%   |
| Burns >20%                        | 0.0%   | 0.0%   | 0.0%   | 0.0%   | 0.0%   |
| Injured nerves (lifelong)         | 0.0%   | 0.0%   | 0.1%   | 0.0%   | 0.2%   |
| Poisoning                         | 0.0%   | 0.0%   | 0.0%   | 0.0%   | 0.6%   |
| Total                             | 100.0% | 100.0% | 100.0% | 100.0% | 100.0% |

**Table S11:** Sensitivity analysis. YLDs per person with alternative AIS-codes presented in Additional file 1, and the comparison to baseline results. See text for details.

| Mode of transport        | Average YLDs per person, alternative AIS-to-injury matrix (lifelong injuries) |        | Average YLDs per person, main results (lifelong injuries) |        | Difference |        |
|--------------------------|-------------------------------------------------------------------------------|--------|-----------------------------------------------------------|--------|------------|--------|
|                          | Average                                                                       | Median | Average                                                   | Median | Average    | Median |
| Pedestrian               | 8.8                                                                           | 6.2    | 9.4                                                       | 6.3    | 94%        | 97%    |
| Bicycle                  | 12.5                                                                          | 11.3   | 12.8                                                      | 11.5   | 98%        | 98%    |
| Other active travel mode | 14.4                                                                          | 19.9   | 14.7                                                      | 20.0   | 98%        | 100%   |
| Moped                    | 18.9                                                                          | 22.1   | 18.7                                                      | 18.5   | 101%       | 119%   |
| Motorcycle               | 15.6                                                                          | 15.4   | 17.2                                                      | 15.4   | 91%        | 100%   |
| Car                      | 17.6                                                                          | 18.1   | 18.4                                                      | 17.8   | 95%        | 102%   |
| Truck                    | 14.7                                                                          | 12.6   | 15.3                                                      | 13.4   | 96%        | 94%    |
| Bus                      | 9.6                                                                           | 6.7    | 10.2                                                      | 6.5    | 94%        | 104%   |
| Other, unknown, missing  | 16.8                                                                          | 15.7   | 19.5                                                      | 16.1   | 86%        | 98%    |

**Table S12:** Sensitivity analysis. YLDs per person with and without 76 815 injuries for which the exact injury type could not be defined. See text for details.

| Mode of transport        | Average YLDs per person, main results |             | Average YLD per person, all injuries |             | Difference |             |
|--------------------------|---------------------------------------|-------------|--------------------------------------|-------------|------------|-------------|
|                          | Male                                  | Female      | Male                                 | Female      | Male       | Female      |
| Pedestrian               | 0.19                                  | 0.11        | 0.33                                 | 0.25        | 172%       | 228%        |
| Bicycle                  | 0.27                                  | 0.21        | 0.27                                 | 0.20        | 100%       | 93%         |
| Other active travel mode | 0.31                                  | 0.11        | 0.23                                 | 0.22        | 74%        | 194%        |
| Moped                    | 0.46                                  | 0.37        | 0.34                                 | 0.14        | 75%        | 40%         |
| Motorcycle               | 0.70                                  | 0.63        | 0.70                                 | 0.45        | 101%       | 70%         |
| Car                      | 0.39                                  | 0.28        | 0.23                                 | 0.16        | 60%        | 58%         |
| Truck                    | 0.38                                  | 0.93        | 0.32                                 | 0.36        | 84%        | 38%         |
| Bus                      | 0.38                                  | 0.15        | 0.18                                 | 0.27        | 48%        | 177%        |
| Other, unknown, missing  | 0.56                                  | 0.52        | 0.50                                 | 0.36        | 89%        | 70%         |
| <b>Average</b>           | <b>0.34</b>                           | <b>0.20</b> | <b>0.30</b>                          | <b>0.21</b> | <b>88%</b> | <b>106%</b> |

**Figure S1:** The fraction of YLDs due to different injury types.

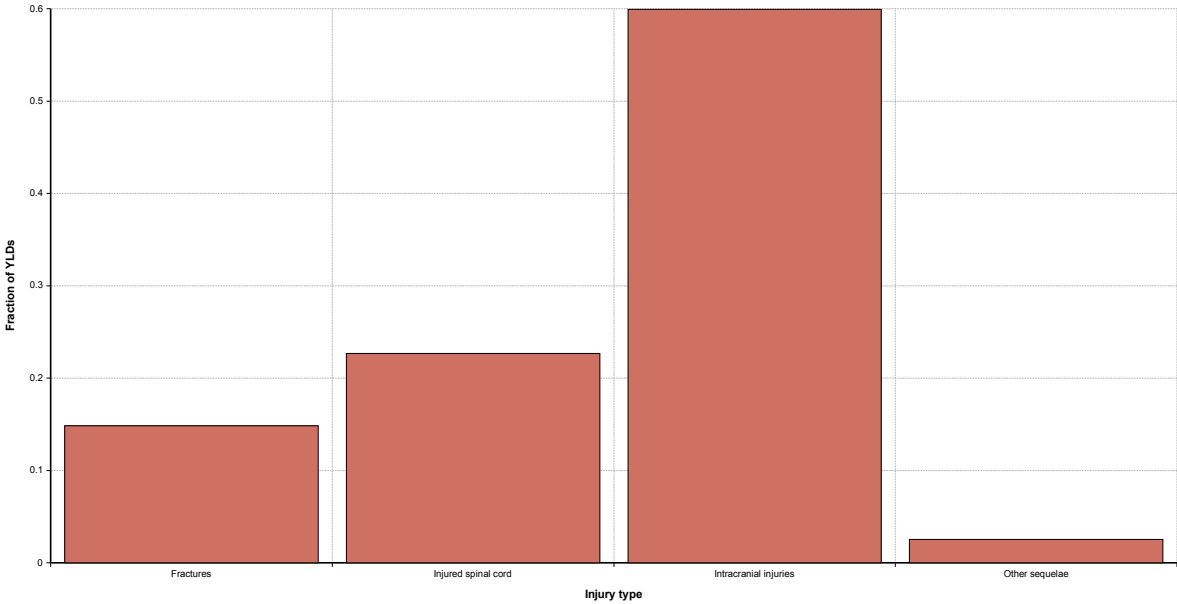



**Figure S2:** YLD per injury in different studies.

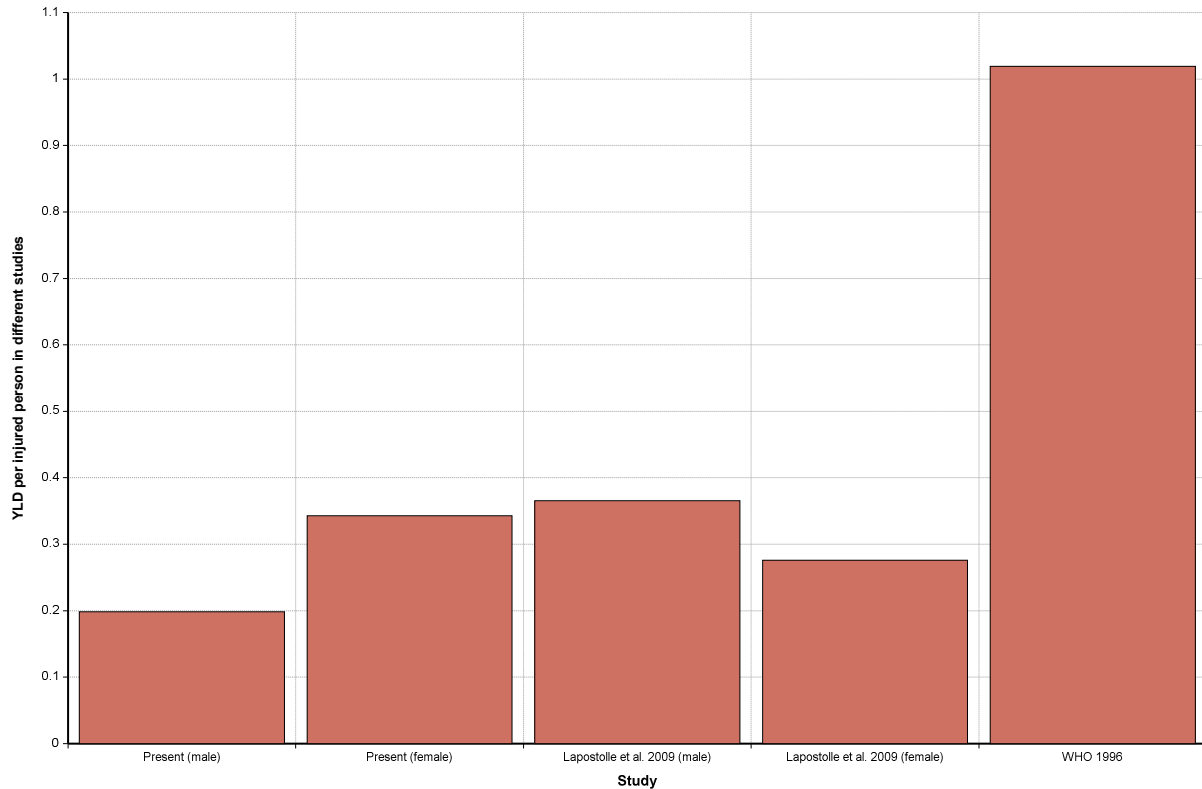

## References

Begg S, Tomijima N: Global burden of injury in the year 2000: an overview of methods. World Health Organization (WHO); 2006:1–22.

Lapostolle A, Gadegbeku B, Ndiaye A, Amoros E, Chiron M, Spira A, Laumon B: The burden of road traffic accidents in a French Departement: the description of the injuries and recent changes. BMC Public Health 2009, 9.

Murray CJL, Lopez AD: The global burden of disease: a comprehensive assessment of mortality and disability from diseases, injuries, and risk factors in 1990 and projected to 2020. Cambridge, MA: Published by the Harvard School of Public Health on behalf of the World Health Organization and the World Bank ; Distributed by Harvard University Press; 1996.

Murray CJL: Quantifying the Burden of Disease – The technical basis for disability-adjusted life years. Bull. World Health Organ. 1994, 72:429–445.
